# Supplementary material for: The Induction of Combined Hyperthermal Ablation Effect of Irreversible Electroporation with Polydopamine Nanoparticle-Coated Electrodes
Source: MDPI journal article supplement (doi:10.3390/ijms25084317), 2024-04-13
Supplement: s1 [file s1]

# Supplement data

## The enhanced thermal ablation effect of irreversible electroporation with dopa nanoparticle-coated electrodes

Sung-Min Jeon <sup>1,2</sup>, Enkhzaya Davaa <sup>1</sup>, Ratchapol Jenjob <sup>1</sup>, Chiravoot Pechyen <sup>3,4</sup>,  
Sitakan Natphopsuk <sup>3,5</sup>, Seok Jeong <sup>6</sup>, Hye Jin Yoo <sup>1,2,\*</sup> and Su-Geun Yang <sup>1,2,\*</sup>

<sup>1</sup> Department of Biomedical Science, BK21 FOUR Program in Biomedical Science and Engineering, Inha University College of Medicine, Incheon 22212, Republic of Korea

<sup>2</sup> Inha Institute of Aerospace Medicine, Inha University College of Medicine, Incheon 22332, Republic of Korea

<sup>3</sup> Thammasat University Center of Excellence in Modern Technology and Advanced Manufacturing for Medical innovation, Thammasat University, Pathumthani 12120, Thailand

<sup>4</sup> Department of Materials and Textile Technology, Faculty of Science and Technology, Thammasat University, Pathumthani 12120, Thailand

<sup>5</sup> Chulabhorn International College of Medicine, Thammasat University, Pathumthani 12120, Thailand

<sup>6</sup> Division of Gastroenterology, Inha University Hospital, Inha University College of Medicine, Incheon 22332, Republic of Korea

\* Correspondence: hyejin\_yoo@inha.ac.kr (H.J.Y.); sugeun.yang@inha.ac.kr (S.-G.Y.)

**Keywords:** Irreversible electroporation (IRE), Polydopamine nanoparticles, Hyperthermal effect, Cancer ablation.

### Monitoring of hyperthermal effects of IRE on hydrogel phantom model

We studied the temperature changes of alginate hydrogel phantoms induced by varying concentrations of NPs under electrical stimulation. The NPs-mixed cylindrical alginate hydrogel phantoms were prepared using the extrusion gelation method. We prepared 4% (w/v) alginate solutions with different concentrations of NPs (0, 47, 188, and 750 µg/mL) by adding sodium alginate (250 cps, 25°C, Sigma-Aldrich, USA) and NPs to distilled water at 50°C. The mixed hydrogel (6 mL) was transferred to a disposable syringe assembled with a 23-gauge needle and allowed to stand at 50°C until all residual bubbles were removed. A cylindrical phantom was formed by dropping the mixture into a 2.5% (w/v) CaCl<sub>2</sub> cross-linking solution (150 mL) at a rate of 0.15 mL/sec. The curing process in the cross-linking solution and the subsequent gentle rinsing process to remove excess residual calcium ions were performed twice. A pair of 23-gauge needle electrodes was inserted into the central region of the alginate phantom specimen (70 mm long).

Monophasic pulses (1kV/cm electric field strength, 0.6 ms duration time, 20 pulses) were delivered to it using a pulse electroporator (ECM 830 Square Wave Electroporation system, BTX Harvard Apparatus, Holliston, MA, USA). The real-time temperature changes of the phantom were monitored using an infrared camera (Optris® Xi 400, Optris GmbH, Berlin, Germany).

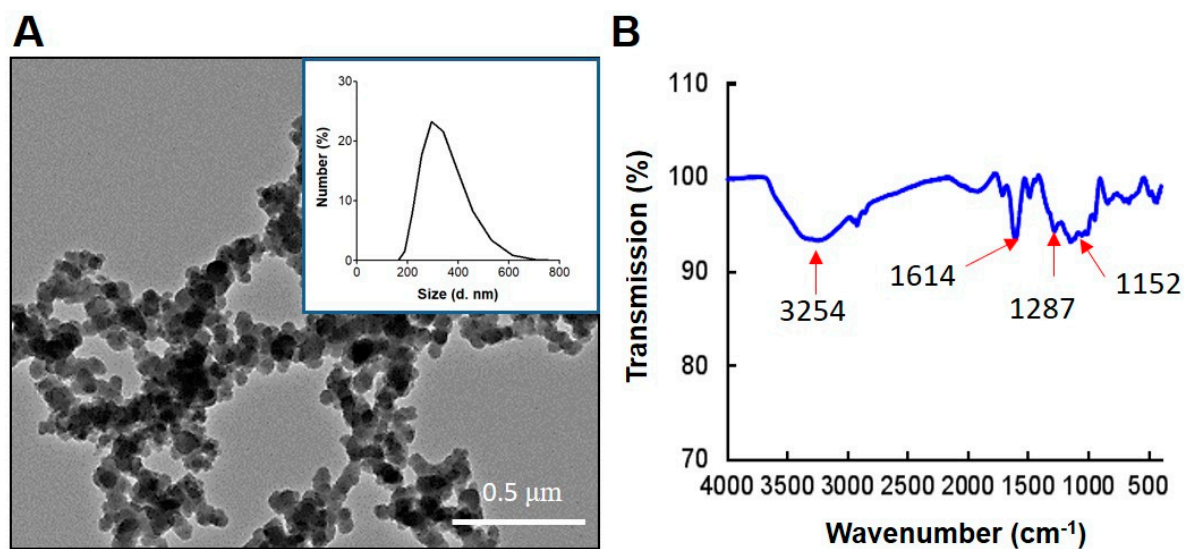

**Figure S1.** (A) TEM image of Dopa NPs (inset: hydrated particle size distribution of Dopa NPs), and (B) FT-IR spectrum of Dopa NPs.

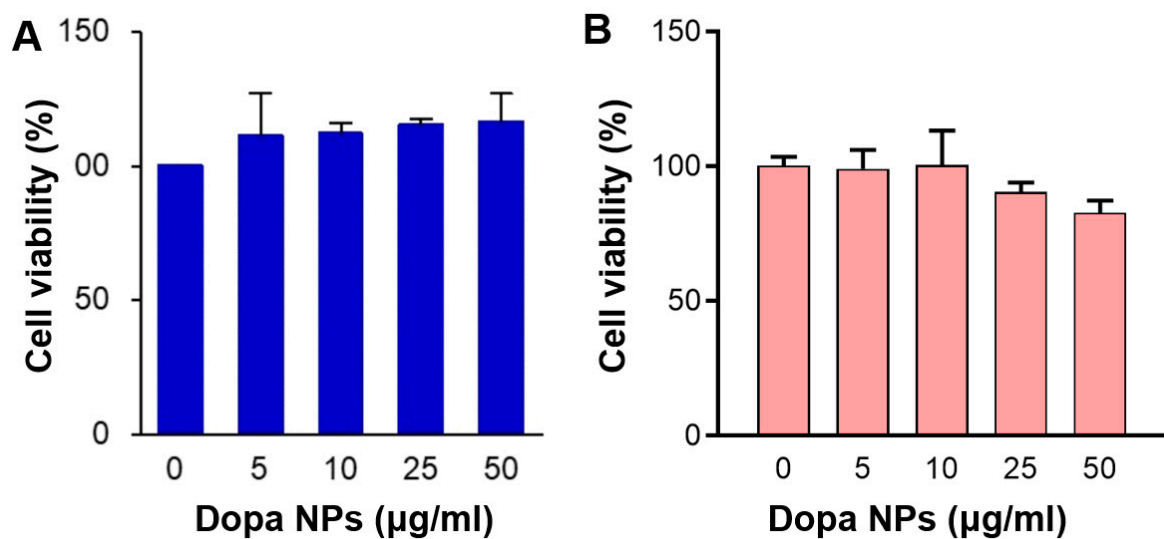

**Figure S2.** *In vitro* cytotoxicity of Dopa NPs against (A) Hep3B cells and (B) L929 cells. The cell viability was determined after treatment with different NPs concentrations for 48 h using the water-soluble tetrazolium assay.

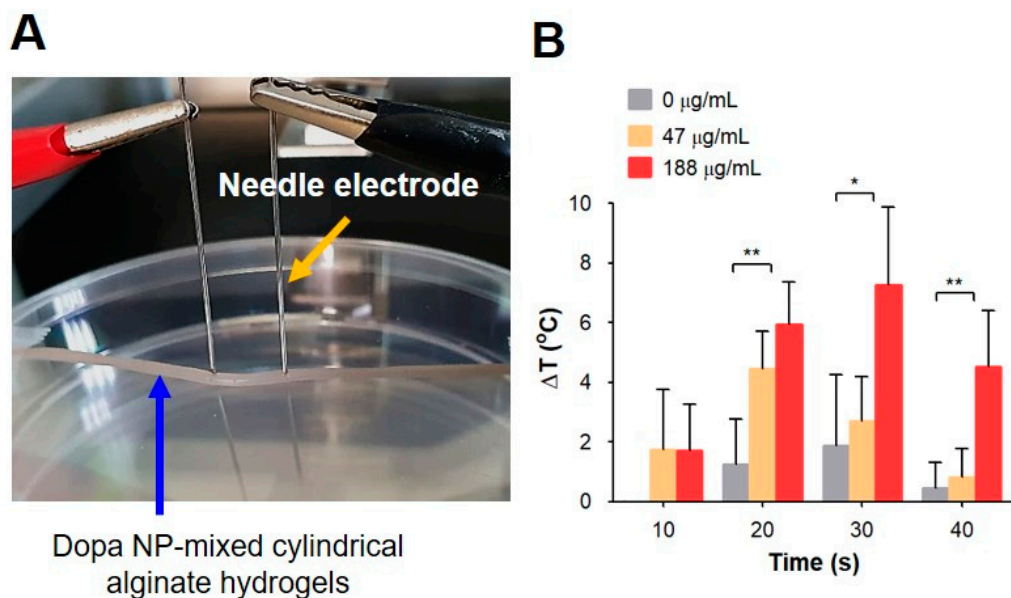

**Figure S3.** Thermal effect of Dopa NPs according to Dopa NPs content in cylindrical alginate hydrogel during irreversible electroporation. (A) Experimental setup for monitoring the surface temperature of NPs-mixed alginate hydrogel phantom. (B) Thermal profile of the NPs-mixed phantom with electroporation (1kV/cm, 0.6 ms-duration time, 20 pulses) over time. Statistically significant value compared with control group data by ANOVA test (\*P<0.05, \*\*P<0.01, n=3).

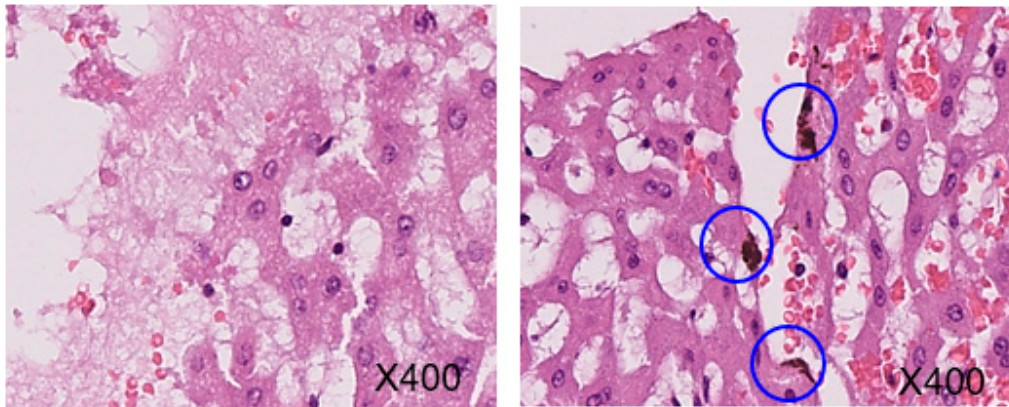

Figure S4. Histopathological observation of the ablated hepatic region after IRE treatment (100  $\mu$ s-duration time, 60 pulses) using an uncoated or Dopa NPs-coated electrodes. Brownish deposits (blue circles) observed in the tissue treated with the coated electrodes.
